# Supplementary material for: The Splendour of Glitter: Silver Leaf in barniz de Pasto Objects
Source: MDPI journal article supplement (doi:10.3390/heritage6100344), 2023-09-27
Supplement: s1 [file s1]

## Article

# El esplendor del brillo: La hojilla de plata en los objetos de barniz de Pasto

María Cecilia Álvarez-White <sup>1</sup>, David Cohen <sup>2,\*</sup> and Mario Omar Fernández <sup>2</sup><sup>1</sup> Conservadora en práctica privada, Bogotá 110221, Colombia, mca4@hotmail.com<sup>2</sup> Laboratorio de Estudios de Artes y Patrimonio-LEAP, Universidad de los Andes, Bogotá 111711, Colombia; mo.fernandez@uniandes.edu.co

\* Correspondence: d.cohen@uniandes.edu.co

**Resumen:** Este artículo presenta hallazgos actuales sobre el uso histórico de la plata y otros elementos metálicos como parte de la técnica decorativa colombiana denominada barniz de Pasto y también conocida como mopa-mopa. Los resultados hacen parte de una investigación en curso más amplia. El objetivo es interpretar y valorar la introducción del metal como un componente significativo en la consolidación de la técnica. Para el estudio se utilizan técnicas de imágenes multiespectrales (macrofotografía de luz visible; fotografía infrarroja y ultravioleta), cortes estratigráficos y mapeo elemental de SEM-EDS. Las evidencias se comparan e interpretan dentro de un marco holístico que sugiere la aparición de la plata como parte de una innovación de la técnica del barniz de Pasto, ya sea como hojilla intercalada entre membranas de resina o como “venturina”, procedimiento que se obtiene al amasar la hojilla entre capas de resina fragmentándola y extendiéndola luego como fondo de las composiciones.

**Palabras clave:** mopa-mopa; barniz de Pasto; hojilla de plata; ciencias de la conservación; venturina

**Citation:** Álvarez-White, M.C.; Cohen, D.; Fernández, M.O. The Splendour of Glitter. Silver Leaf in barniz de Pasto Objects. *Heritage* **2023**, *6*, 6581–6595. <https://doi.org/10.3390/heritage6100344>

Academic Editors: Lucia Burgio, Dana Melchar, Monica Katz

Received: 26 July 2023

Revised: 9 September 2023

Accepted: 23 September 2023

Published: 27 September 2023

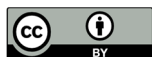

**Copyright:** © 2023 by the authors. Submitted for possible open access publication under the terms and conditions of the Creative Commons Attribution (CC BY) license (<https://creativecommons.org/licenses/by/4.0/>).

## 1. Introducción

Las comunidades prehispánicas del departamento de Nariño en Colombia elaboraron cuentas de collar con la resina natural conocida como mopa-mopa [1] proveniente de la planta *Elaeagia pastoensis* L.E Mora, que pertenece a la familia Rubiaceae y crece silvestre en la selva sur occidental del país. Durante el período colonial temprano y posteriormente, con la consolidación del virreinato de la Nueva Granada a comienzos del s. XVIII, la técnica evoluciona a partir de nuevos materiales, objetos y diseños como respuesta a la gran demanda de estos objetos. Las piezas de madera ornamentadas con barniz de Pasto se extienden durante los siglos XIX y XX hasta nuestros días con los maestros artesanos de la ciudad de Pasto que aún hoy continúan con la tradición. Esta larga trayectoria en la transmisión e innovación de conocimientos y saberes, reconocidos como patrimonio cultural inmaterial de la humanidad en diciembre 2020, hace parte de la lista de salvaguardia urgente de la UNESCO.

Sin embargo, a pesar de la importancia cultural y artística de estos bienes, aun son pocos los estudios técnicos realizados para la caracterización [2-5] e identificación de sus transformaciones a lo largo del tiempo. En particular, es notoria la falta de investigaciones en lo que respecta a la introducción y uso de materiales como la hojilla de plata y el latón.

A las anteriores falencias se debe agregar la ausencia de una base documental histórica, en cuanto que, hoy en día, sólo se dispone de la descripción genérica de los cronistas del período colonial y de los viajeros del s. XIX; tampoco se conocen, con contadas excepciones [6], fechas o inscripciones que permitan una datación directa de ellas.

Otra situación que incide para el conocimiento y difusión de la técnica consiste en que la mayor parte de las obras pertenecen a colecciones privadas del país y del extranjero

y, sólo en contados casos, se encuentran a disposición del público; más aún, los museos carecen de series representativas que permitan adelantar estudios técnicos.

La presente investigación se inserta dentro de un proyecto más amplio, aún en curso, liderado por la conservadora María Cecilia Álvarez-White con el apoyo del Laboratorio de Estudios de Artes y Patrimonio – LEAP, de la Facultad de Artes y Humanidades y la Vicerrectoría de Investigación y Creación de la Universidad de los Andes.

El objetivo es mostrar de manera exploratoria el uso de hojillas de metal en el desarrollo de la técnica del barniz de Pasto, con base en las evidencias resultantes de los análisis de laboratorio, para brindar un marco de interpretación que sirva de apoyo a su posterior profundización.

El efecto del brillo en los objetos decorados con esta técnica se manifiesta, en nuestra opinión, posiblemente a partir de mediados del siglo XVII. Su mayor esplendor se sitúa en el XVIII y con algunas variaciones se extiende a lo largo del XIX y del XX hasta la actualidad.

Los primeros destellos metálicos se lograron gracias al manejo combinado de la hojilla de plata con la mopa-mopa, que paulatinamente se emplea de manera extensa hasta alcanzar su cobertura sobre las superficies ornamentadas con lo que se adquiere un resplandor iridiscente. Posteriormente, en el siglo XIX se suma la introducción de la hojilla de latón, consistente en una aleación de cobre y zinc que añade la tonalidad cobriza a la decoración.

## 2. Materiales y Métodos

Para la recolección y procesamiento de los datos se planteó un protocolo de acercamiento a las piezas en el cual los objetos disponibles fueron numerados con un código único que los identifica. En primera instancia se clasificaron en grupos que mostraran características visuales comunes a partir de las siguientes variables:

1. El grosor y el relieve de las decoraciones de Barniz
2. La opacidad o brillo de la superficie
3. La aparición de colores vibrantes
4. La presencia de elementos o brillos metálicos

Se han revisado 230 objetos decorados con mopa-mopa, de los cuales 91 se analizaron con diferentes técnicas para explorar aspectos de su materialidad y caracterizar los elementos metálicos que otorgan el brillo a las decoraciones. Posteriormente se eligieron objetos representativos de cada grupo para la selección final de 41 objetos.

En las obras seleccionadas se realizó un registro fotográfico detallado con luz visible, fluorescencia inducida con luz ultravioleta (UVF) y fotografía con luz infrarroja (IR). Para las fotografías y para la fluorescencia UV se empleó una cámara Canon® EOS 7D Mark II (Canon, Tokio, Japón) con una lámpara UV SPECTROLINE® Tritan 365 (Spectroline, Nueva York, NY, EE.UU.) y un filtro UV TIFFEN® (Tiffen, Ciudad Oklahoma, OK, EE.UU.). Las fotografías IR fueron llevadas a cabo con un equipo de fotografía técnica de Cultural Heritage Science Open Source – CHSOS (CHSOS, Viagrande, Italia) con una cámara NIKON® D7100 modificada (NIKON, Tokio, Japón). Como fuente de iluminación se empleó una lámpara ELINCHROM® D-Lite LX-4 (ELINCHROM, Nueva York, NY, EE.UU.).

Estos métodos multiespectrales permitieron la identificación de ciertas decoraciones metálicas, especialmente en áreas en las que los deterioros o intervenciones de los objetos dificultaban su visualización.

A partir de este primer acercamiento y del análisis de la información se clasificaron los bienes con presencia de brillos metálicos para elegir finalmente 11 objetos para la realización de análisis de laboratorio. De estos se tomaron entre 2 y 4 muestras para realizar cortes estratigráficos y análisis elementales. Las muestras se englobaron en resina acrílica para su manipulación y se analizaron morfológicamente con un microscopio óptico. Luego se llevaron al microscopio de barrido de electrones y de haz de iones

focalizado FE-MEB LYRA3 de TESCAN del Laboratorio MicroCore. El MEB tiene integrado un sistema de microanálisis por espectroscopía de dispersión de energía de rayos X, EDS para la identificación y el mapeo elemental. Los análisis cuantitativos tienen una precisión de  $\pm 2\%$ , con límites de detección de 100 ppm aproximadamente.

Se consultaron los relatos de cronistas y viajeros, únicos documentos de referencia conocidos hasta la fecha, para conocer los lugares de fabricación de los objetos y describir algunos de sus detalles. Se destacan los relatos de Fray Pedro Simón (1574-1628), quien quizás sea el primero en mencionar la planta productora de resina, así como los objetos que con ella se adornaban y los lugares de producción, señalando a Mocoa, Quito e incluso “otras partes del Perú” donde se elaboraban los vasos ceremoniales incas de madera (conocidos como “Queros”) decorados con mopa-mopa [7] (p.273).

Además, se consultaron otros cronistas que aportan información complementaria como Lucas Fernández de Piedrahita (1624-1688) [8], Jorge Juan y Antonio de Ulloa (1749) [9], Miguel de Santisteban (1691-1776) [10], Juan Magnin, S. J. (1701-1753) [11], Fray Juan de Santa Gertrudis (1724-1799) [12] y Juan de Velasco (1727-1792) [13].

En los inicios del siglo XIX se cuenta con datos más concretos sobre los materiales y formas de trabajo en las detalladas descripciones de viajeros como Alexander von Humboldt (1769-1859) quien en 1801 visitó la ciudad de Pasto y consignó en sus diarios interesantes aspectos sobre los materiales empleados y de la técnica de elaboración al describir, entre otros, detalles como: “*las sombras se obtienen colocando una membrana sobre la otra*” [14] (p. 127a).

El botánico José Celestino Mutis (1733-1808) quien a partir de 1783 tuvo a su cargo la Expedición Botánica del Nuevo Reino de Granada, menciona varios pigmentos como el oropimente al igual que colorantes naturales utilizados en la ornamentación con barniz de Pasto [15].

El coronel John Potter Hamilton (1777-1873) llega al país en 1823 pocos años después de la declaración de independencia y se refiere elogiosamente a las totumas adornadas con flores de brillantes colores [16] (p. 165). El químico francés Jean Baptiste Boussingault (1801-1887) describe en sus memorias “objetos de madera como calabazas, cajas y recipientes dedicados a guardar vino o aguardiente” decorados con la resina, detalla su técnica de aplicación y algunas de sus características químicas [17] (p. 460).

Edouard André (1840-1911) cuando se refiere a la resina hace énfasis en su “consistencia extraordinaria, resiste el frío, el calor y el agua y se adhiere fuertemente a la madera” [18] (p.755) e incluye, un grabado que permite apreciar un taller de la época.

El botánico norteamericano estudioso de la flora tropical, Isaac Farewell Holton (1812-1874) narra sobre totumas y otros objetos elaborados en Pasto con la mopa-mopa “que traen de las cabeceras distantes del Amazonas” [19] (p.538).

### 3. Resultados

#### 3.1. La técnica del barniz de Pasto antes de la introducción de los metales

Antes de la llegada de los españoles los indígenas de la zona de Pasto conocían la resina, el lugar donde crecía la planta quela produce, las épocas de recolección de las yemas y su procesamiento. Ellos elaboraron las cuentas de collar con mopa-mopa, las cuales tenían uso simbólico y ceremonial. Su documentación está asociada a contextos de enterramiento realizadas en excavaciones arqueológicas en el Parque de San Agustín, en el actual departamento del Huila [20] y en la vereda de Miraflores, en Nariño [21].

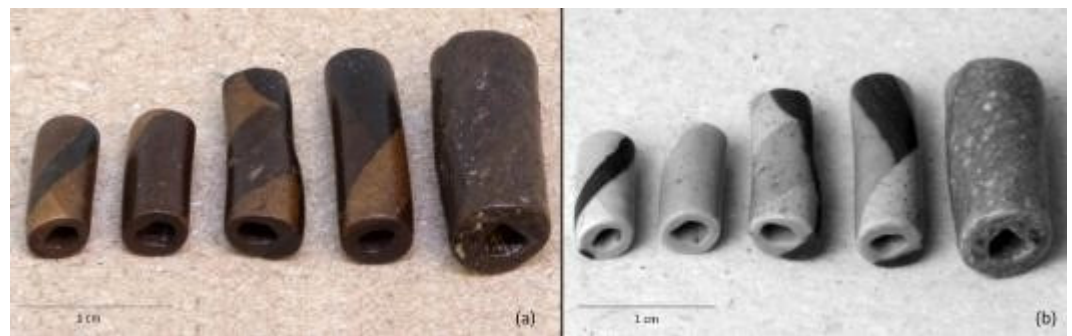

**Figura 1.** Grupo de cuentas de collar con iluminación normal (a) e infrarroja (b). Los cuatro de la izquierda muestran bandas de resina intercaladas, dos de ellas coloreadas. La cuenta más grande, en el extremo derecho, elaborada con resina en su estado natural y sin teñir. Colección privada. (Fotografías: Cohen, D).

En las cuentas no solo empleó el color natural de la resina, que actualmente tiene apariencia marrón, quizás, a causa del envejecimiento natural por tratarse de un material orgánico (Figura 1), sino que, además, presentan otras dos tonalidades, una de acabado claro para la que se utilizó carbonato de calcio, posiblemente cal (análisis MEB realizado por M.O.F) y otra de tonalidad oscura, lograda con un colorante de procedencia orgánica, todavía pendiente de identificación.

Las bandas se elaboraban con delgadas láminas de resina, las cuales, aún calientes, se entrecruzaban para realizar el enrollado, en diagonal, alrededor de un elemento de madera. Luego se debían cortar del tamaño deseado, de hasta 3 centímetros de largo, para tomar su consistencia definitiva, al enfriarse. (Figura 1). El espesor aproximado de las láminas es de 2 a 3 milímetros.

Las cuentas de collar prehispánicas, únicos elementos de esa época hechos con mopa-mopa conocidos hasta el momento, constituyen el antecedente de la técnica decorativa denominada en la actualidad como barniz de Pasto.

### 3.2. El inicio del período colonial

Durante la colonia temprana (posiblemente hacia finales del siglo XVI e inicios del XVII), con motivo de la llegada de los españoles, la mopa-mopa se comienza a utilizar para decorar objetos de madera elaborados con base en modelos europeos. La demanda de estas piezas genera un mercado de obras que constituían elementos de prestigio de la nueva clase social articulada al poder político y eclesial. Se fabricaban en madera de cedro, abundante en la zona de Pasto, tal y como lo describe en el s. XVIII fray Juan de Santa Gertrudis (vol. 3, p.110). El análisis del soporte de madera de un escritorio propiedad del Victoria and Albert Museum (realizado por el Dr. Peter Gasson del Royal Botanic Gardens Kew) de Londres corrobora la afirmación del cronista [22]

Este conjunto de piezas realizadas en lo que se ha denominado para la presente investigación como período inicial, se caracteriza por una reducida gama cromática de aspecto mate, aunque conservan el brillo satinado de la resina. En la decoración se exhiben elementos de la tradición indígena entremezclados con vegetación y animales del entorno; en ocasiones se aprecian reinterpretaciones propias de figuras europeas como el águila bicéfala de los Habsburgo.

La madera está recubierta en su totalidad con una película transparente de resina que cumple una función protectora sobre la cual se aplica la decoración. Las láminas se tinturan con colorantes de procedencia orgánica y con albayalde en polvo cuando se quieren obtener tonalidades claras. En estas obras las láminas de resina, mucho más delgadas que las empleadas en las cuentas de collar, tienen un espesor aproximado de 50µ a 200µ. Sobre el fondo general de color oscuro, rojo guinda o verde aceituna, se aplican las membranas previamente recortadas. Se extienden una a continuación de otra para

rellenar las figuras, o simplemente se aplican como líneas de contorno e incluso sueltas, a manera de roleos. (Figura 2).

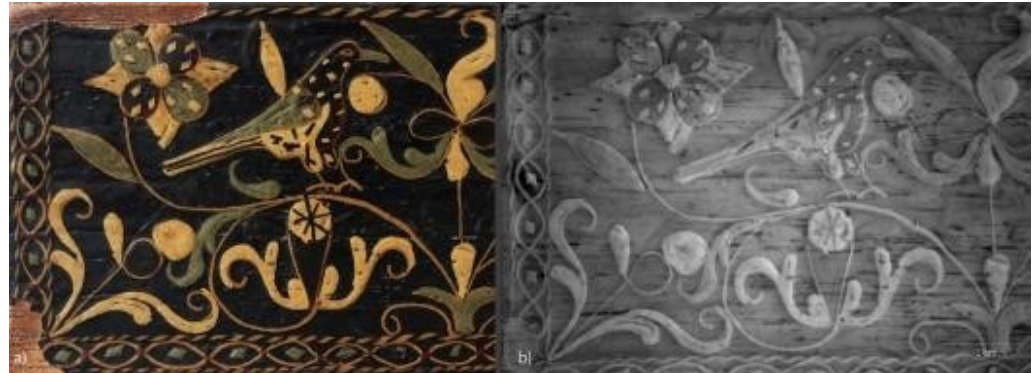

**Figura 2.** Las zonas claras, resultantes de la mezcla de la resina con albayalde, tienen un acabado opaco. Las zonas de color rojo cereza, como el pecho del pájaro, se produjeron con una membrana transparente teñida con un tinte orgánico como se observa en la imagen (a). A la derecha (b), bajo luz infrarroja, se observa el ligero relieve de las aplicaciones que componen los diseños, así como los pequeños recortes de resina con los que se rellenaron los pétalos de las flores en la esquina superior izquierda. (Fotografías: Cohen, D). Colección privada.

El carbonato de calcio empleado en el período prehispánico se sustituye ahora por el albayalde que llega a través del comercio desde el puerto de Sevilla [23] y al mezclarlo con la resina adquiere apariencia mate. Este pigmento se maneja hábilmente para lograr gradaciones de los tonos claros al utilizarlo en diferentes concentraciones (Figura 3). El blanco de plomo también se caracterizó como parte de la decoración de los queros incas peruanos [24]. Es posible que en estos casos se haya añadido un tinte vegetal, como la raíz de la escobedia o “azafrán de la tierra”, como menciona Humboldt (p. 127a), para lograr el color amarillo ocre.

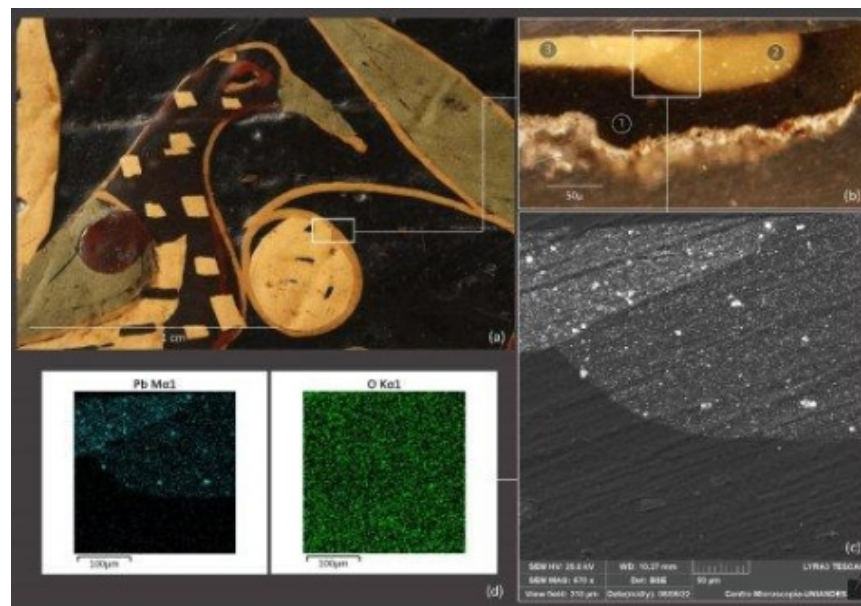

**Figura 3.** (a) Detalle de la decoración realizada con láminas de mopa-mopa sobre la base de color oscuro que sirve de fondo a la composición. (Fotografía: Álvarez-White, M.C). En las capas 2 y 3 de la sección estratigráfica (b) se pueden observar dos concentraciones diferentes del pigmento blanco (albayalde). La capa 1 corresponde a la resina que es la base del diseño. En la imagen SEM (c), los puntos blancos de las capas 2 y 3 confirman la presencia de blanco de plomo en el mapeo elemental (d). (Análisis y fotografía: Fernández, M.O). Colección privada.



La tonalidad oscura se logra con el añil calcinado que en ocasiones sirve también como fondo general a los diseños. Los verdes se obtienen al mezclar el azul del índigo con el extracto de una planta, aún no identificada, rica en componentes amarillos a base de flavonoides con altos niveles de quercetina y kaempferol [25]. El rojo, pendiente de ser caracterizado mediante análisis químicos, por su apariencia podría ser cochinilla [26]. Es necesario tener en cuenta que por tratarse de piezas que han sufrido procesos naturales de alteración la percepción de los colores también ha cambiado.

### 3.3. Introducción de la hojilla metálica

En la medida que transcurre el período colonial se comienzan a elaborar objetos cuya ornamentación es más compleja al enriquecer el uso de pigmentos como el blanco de plomo con la introducción de la hojilla de plata y de un pigmento blanco con acabado sólido, conocido como calomel. Esta mezcla de materiales crea una decoración que intercala elementos brillantes con otros de aspecto mate.

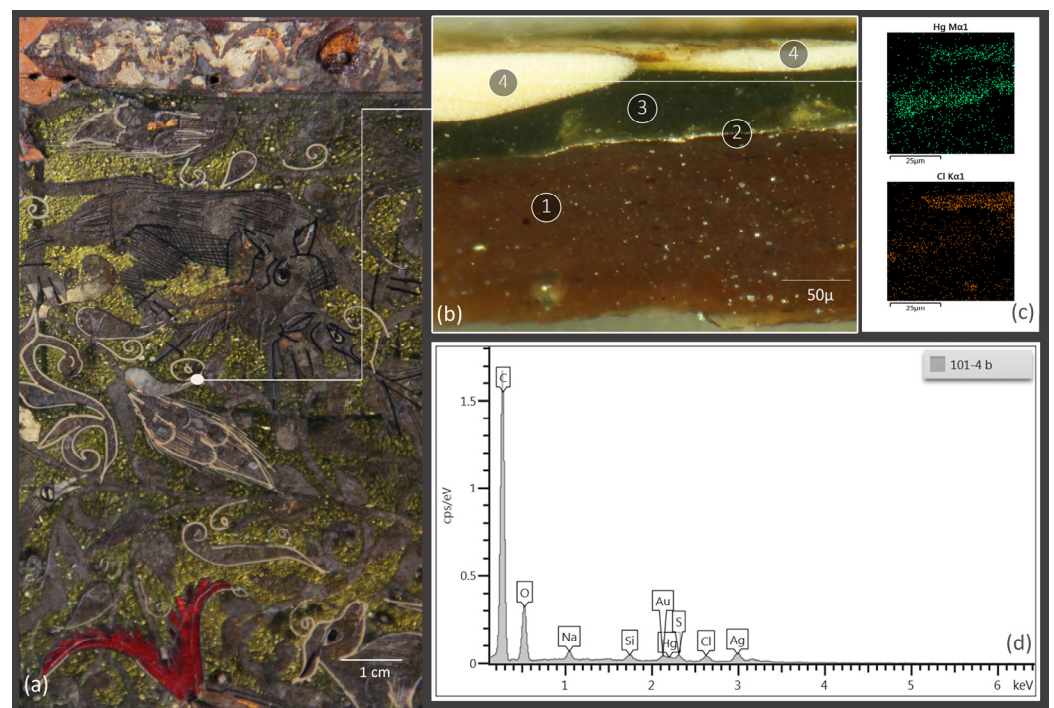

**Figura 4.** Corte estratigráfico a 200× (b) tomado de una franja blanca de la ornamentación (a). El punto blanco en la imagen corresponde al lugar de la toma de muestra. (Fotografía: Álvarez-White, M.C). En la imagen b, la capa 4 muestra la presencia de mercurio (Hg) y cloro (Cl), lo que confirma el pigmento de calomel. La hoja de plata es visible en la capa 2, mientras que las capa 1 es la resina de base y la 3 corresponde a la resina coloreada de verde. El espectro EDS (d) muestra el mercurio y el cloro detectados en el mapeo elemental (c). La presencia de oro (Au) se debe al proceso de recubrimiento de la muestra para el análisis SEM. (Análisis y fotografía: Fernández, M.O). Colección privada.

Se observa mayor esmero en el procesamiento de las láminas de resina que ahora se adelgazan aún más para alcanzar un espesor aproximado entre 30 μm y 50 μm. Con la introducción del metal se amplía la gama cromática: se obtiene una tonalidad clara iridiscente cuando la membrana que lo cubre se emplea en su tonalidad natural; o dándole otros matices de diferentes colores, cuando se tintura con colorantes. En este período aparecen por primera vez fondos completos con destellos metálicos sobre los que aplican los diseños (Figura 4).

Las cenefas que enmarcan las composiciones suelen estar realizadas con hojilla de plata y en su interior se aprecian diseños de influencia Namban. [27], como los que se

observan en la arqueta del Museo Victoria and Albert de Londres (registro W7-2018). Los recientes análisis realizados en esta pieza dieron como resultado la presencia de calomel utilizado en las finas líneas blancas de acabado mate de acuerdo con Humphrey et al., (p. 150).

El Calomel ( $\text{Hg}_2\text{Cl}_2$ ) blanco de mercurio es un pigmento sintético altamente tóxico que no se ha encontrado en América del sur en objetos artísticos con excepción de la técnica del barniz de Pasto. En varios proyectos de investigación, como los ya mencionados por Pozzi et al., [3], Sánchez L., [4], Burgio et al., [5], and Álvarez-White [6], Pls do not forget comma after Álvarez-White [6], se ha confirmado el uso en la decoración de diferentes piezas [28].

Durante el período colonial el azogue, como también se conoce al mercurio, era empleado principalmente para procesos de elaboración del oro y de la plata. Barba menciona su utilización desde 1574 en las minas de Potosí en Bolivia [29] (p. 71). En 1789 Juan de Velasco menciona cómo en las montañas de Cuenca, Ecuador, existía una mina de azogue cuya producción permitía abastecer otras provincias, pero tuvo que ser cerrada por el peligro que representaba para la "salud de los indios" (vol. 1, p. 45). Trabajos más recientes indican que en Europa se empleó en los siglos XV y XVI [30].

En la mayor parte de las piezas que presentan diseños blancos realizados con calomel, se aprecian otros intercalados con aspecto opaco, así como decoraciones elaboradas con hojilla de plata recubiertas por membranas de mopa-mopa. Estas pueden estar o no coloreadas y adquirir tonalidad dorada, verde o azul para realzar la iridiscencia del metal que se encuentra debajo. (Figura 5).

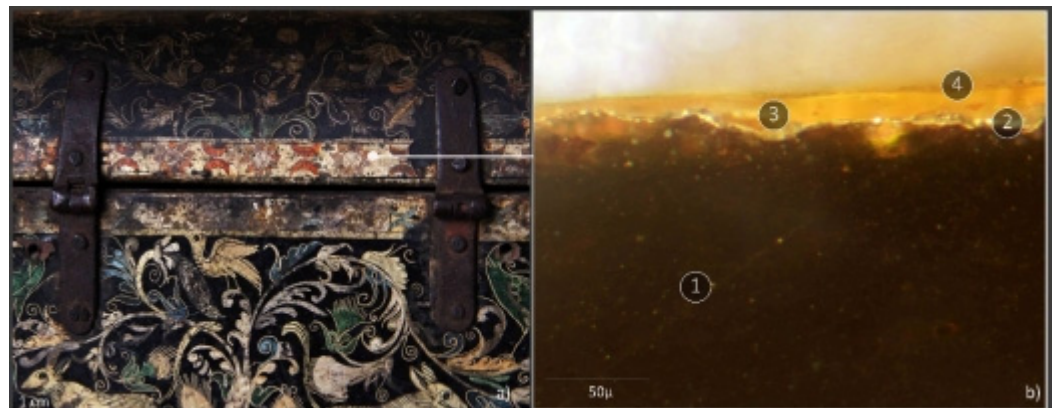

**Figura 5.** Algunos elementos realizados en varios colores iridiscientes, mediante el uso de hojilla de plata (a), son un ejemplo de la introducción de diseños con acabado metálico mezclado con otros de apariencia mate. El calomel, que tiene un acabado opaco, se aplica en forma de finas tiras blancas para delimitar los contornos o bien en forma de líneas. El punto blanco en la imagen (a) corresponde al lugar de la toma de muestra. (Fotografía: Álvarez-White, M.C). La sección estratigráfica (400x) (b) muestra la capa de resina que sirve de fondo (1), luego la hoja de plata (2) y encima de esta última, una capa de resina de 15  $\mu$  de espesor (3). Encima hay una fina capa de tierra acumulada (4) (Análisis y fotografía: Fernández, M.O). Colección privada.

Como parte de la técnica del barniz de Pasto, la hojilla de plata se manejaba como una estructura compleja denominada "membrana compuesta" según Álvarez-White (2023, p. 168). Esta consistía en extender la hoja metálica sobre una lámina de mopa-mopa para luego cubrirla con otra capa de mopa-mopa que podía estar teñida o no con un colorante orgánico en polvo. De esta forma, el metal conserva su brillo metálico evitando procesos de corrosión, que sólo se producen cuando el metal queda expuesto por desgaste o uso, ennegreciéndose por oxidación.

Estas películas compuestas se aplicaban sobre la superficie de madera con una delgada capa de resina. En 1771, el Padre Cicala describió este procedimiento de la siguiente manera: "cuando el artesano quiere que cierto campo o flor parezca plata,

después de pintar la primera capa [resina], extiende la hoja de plata y encima esto le pinta otra capa de barniz del color que quiere” [31] (p. 514). Esta técnica decorativa todavía se emplea hoy en día de manera similar.

Se debe tener en cuenta que, desde el período prehispánico, el procesamiento de la resina implicaba su masticación, tal y como lo menciona Santa Gertrudis (vol. 3, p. 110) y Humboldt (p. 127a) quién a este respecto señala que la saliva jugaba un papel importante para lograr láminas homogéneas y para amalgamarla mejor con los colorantes y los pigmentos como el blanco de plomo. Todavía a mediados del siglo XX, Alfonso Zambrano, reconocido maestro tallador de madera en la ciudad de Pasto, mencionaba cómo, hacia 1940, los barnizadores que llegaban a su taller para solicitar la fabricación de pequeños muebles de madera (Figuras 6 y 7) “tenían los dientes muy gastados y se les reconocía a distancia por el aspecto musculado y potente de sus mandíbulas” [32] (p. 21).

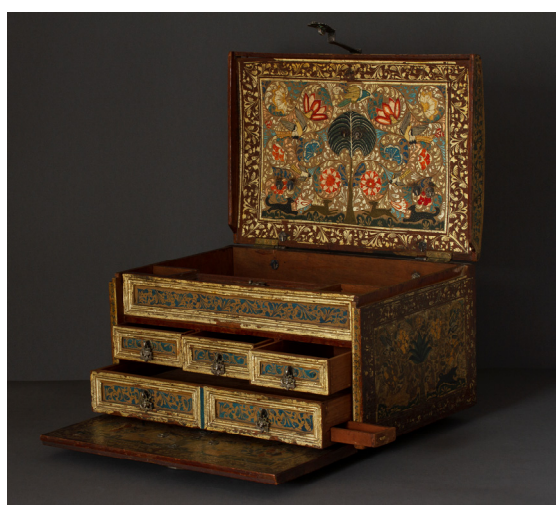

**Figura 6.** Ejemplo de la conformación estructural de un escritorio típico, común desde la época colonial hasta el siglo XVIII. Los objetos de este tipo están hechos de madera y equipados con cajones en los que a menudo se encuentran compartimentos secretos. Todas las superficies exteriores también están ornamentadas con barniz de Pasto. La tapa y el frente abatible son plegables. “Escritorio de la palmera”, Dimensiones abierto: 46 x 39,5 x 26 cm. Colección privada. (Fotografía: Álvarez-White, M.C).

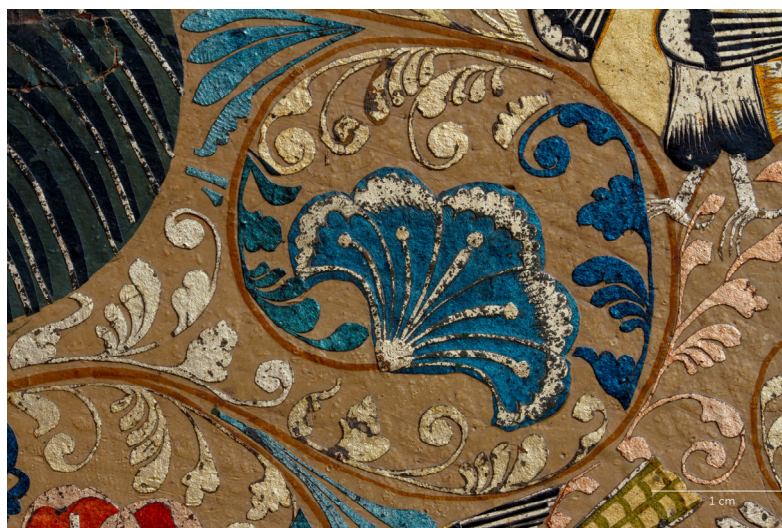

**Figura 7.** La fotografía con luz rasante permite apreciar el relieve natural provocado por la superposición de capas sobre el fondo mate, el cual fue elaborado con una mezcla de resina mopa-mopa y blanco de plomo. En las membranas compuestas, los colores utilizados para tinturar la



resina que recubre la hojilla de plata se equilibran hábilmente para lograr el efecto iridiscente. “Escritorillo de la palmera”. Colección privada. (Fotografía: Álvarez-White, M.C)

### 3.4. Los efectos iridiscentes

De acuerdo con las descripciones que hacen cronistas y viajeros desde el siglo XVIII, las decoraciones con barniz de Pasto adquieren una identidad característica por su brillo que se puede equiparar con el de la porcelana China. (Fray Juan de Santa Gertrudis 1970, vol. 1, p. 175).

Posteriormente los diseños con hojilla de plata se extienden sobre fondos opacos realizados con una mezcla de resina con blanco de plomo. Se incrementa así su luminosidad y la paleta cromática se diversifica aún más. El blanco iridiscente del metal de plata complementa el colorido.

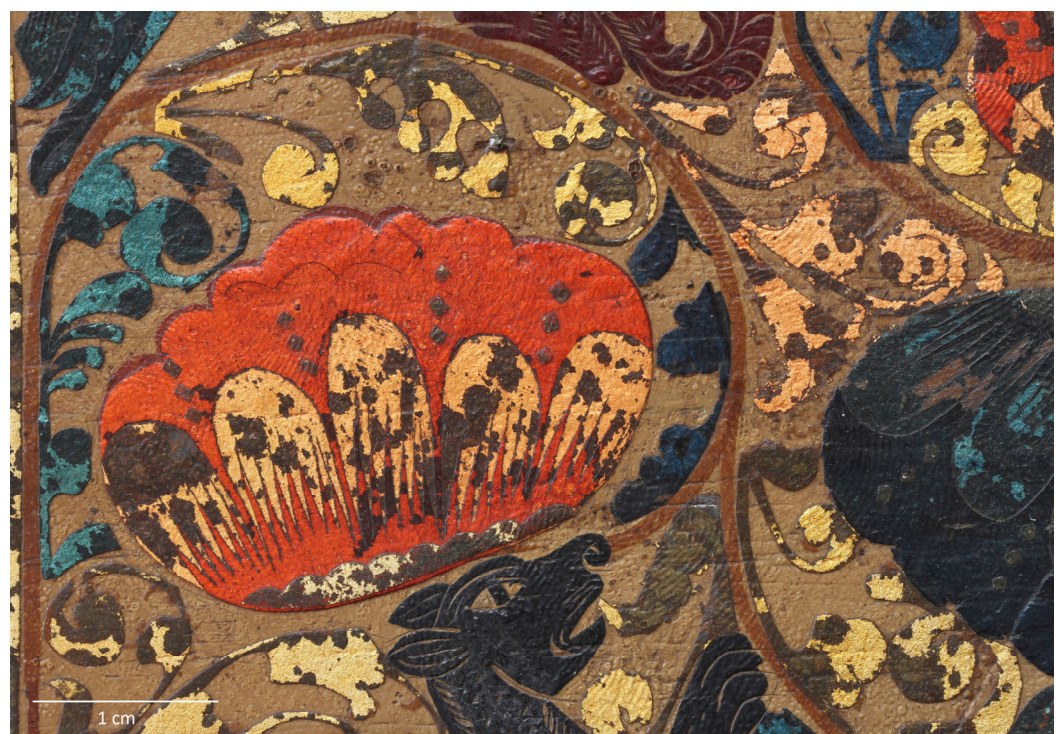

**Figura 8.** Detalle de la contratapa de un escritorillo con adornos metálicos en diferentes tonalidades, incluido el dorado, fruto del efecto que produce la membrana de resina tinturada de amarillo. También se pueden observar huellas dactilares. El fondo general de resina es de acabado mate. (Fotografía: Álvarez-White, M.C.). Colección privada.

Aunque no se han identificado aún todos los colorantes utilizados, el índigo se sigue empleando en varias concentraciones. Es posible que este sea el mismo añil (*Indigofera suffruticosa*) como se denomina la especie americana y que según Humboldt (p. 127a) se empleaba calcinado o muy concentrado. Bruquetas [33] (p. 163) explica que este colorante americano era llevado de América a España en grandes cantidades. Es probable que la escobedia, por su coloración amarilla, sea la que confiere el acabado áureo al metal plateado. No se descarta la utilización de otros colorantes como la cochinilla y el achiote (*Bixa orellana*). (Figura 8).

Se desconoce la razón por la cual el blanco de mercurio no se vuelve a utilizar en esta técnica y en qué momento preciso el blanco de plomo, con su aspecto mate, toma lugar como fondo de las composiciones.

Es común encontrar huellas dactilares producto de la presión manual para fijar las membranas cuando todavía están calientes (Figuras 8 y 9). Posiblemente la finura de estas películas cuyo espesor está entre 10µ y 30µ aproximadamente, dio lugar a que en 1740

Miguel de Santisteban se refiriera a ellas como “telas de cebolla” [34] (p. 125) y en 1789 Juan de Velasco las describió como “más sutiles que el papel más delgado de la China” (vol. 1, p. 56) (Figura 10).

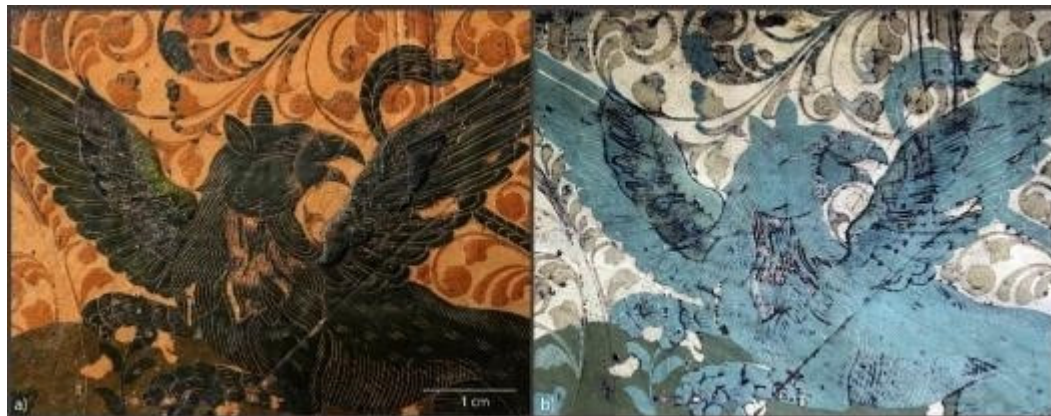

**Figura 9.** Detalle de una figura mítica—un grifo—aplicada sobre fondo mate (a) (Fotografía: Álvarez-White M.C). Bajo la luz ultravioleta (b), el material que da el color verde a la figura del grifo adquiere una tonalidad turquesa. Los motivos vegetales del fondo – volutas – que en buena parte han perdido su revestimiento de hojilla de plata y originalmente estaban teñidas de azul oscuro, se pueden ver en un tono gris claro. Destacan restos de metal coloreado en tonos oscuros que realzan detalles en las alas del animal y en algunas volutas. El fondo general de la composición, producto de la mezcla de resina con blanco de plomo, emite fluorescencia blanca. (Fotografía UVF: Cohen D.). Colección privada.

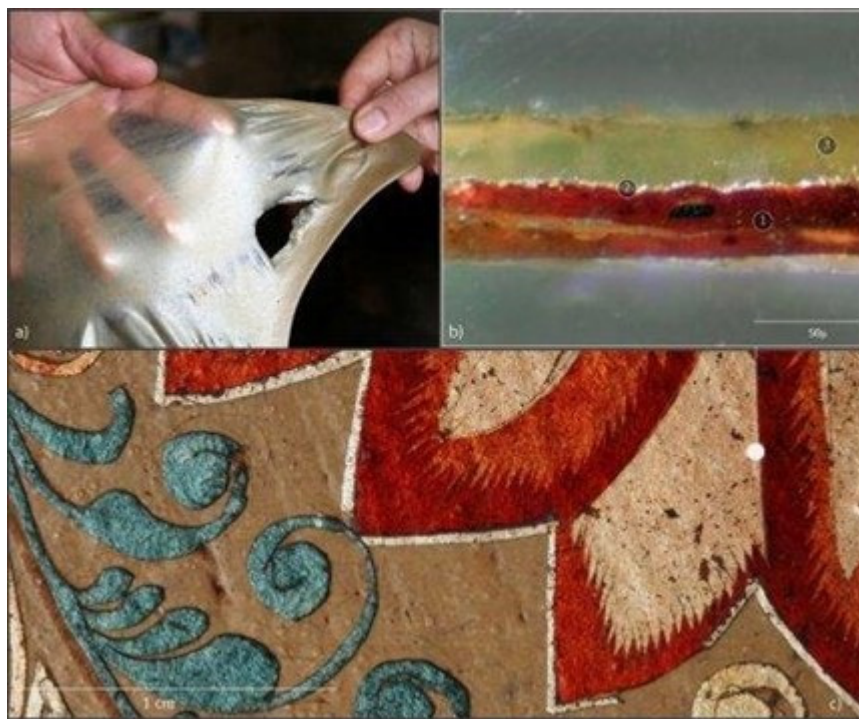

**Figura 10.** Las delicadas membranas de resina descritas en el siglo XVIII se fabrican de manera similar en la actualidad (a). En la sección estratigráfica (400×) (b), es visible la resina teñida de amarillo (3) colocada sobre la hojilla de plata (2). El estrato 1 corresponde a la capa de resina teñida de rojo. Las membranas de mopa-mopa sutilmente tinturadas de rojo se superponen para lograr el sombreado que describe Humboldt (c). El punto blanco en la imagen (a) corresponde al lugar de la toma de muestra. (Fotografías a y c: Álvarez-White, M.C) (Análisis y fotografía: Fernández M.O). Colección privada.



Otra forma de utilizar la hoja de plata, que hasta donde sabemos se emplea exclusivamente en la técnica del barniz de Pasto, fue mencionada por Humboldt en 1801 como "venturina" (p. 127a). Es probable que la hubiese denominado así por su parecido con el efecto óptico que presenta la piedra semipreciosa que tiene ese nombre. Esta es una variedad de cuarzo, cuyas inclusiones de mica provocan un efecto iridiscente similar al de la hojilla de plata. La "venturina" se obtiene utilizando la hoja metálica entre dos membranas de mopa-mopa y, a diferencia del modo tradicional, luego se amasa añadiéndole un poco más de resina. Como resultado de este proceso, el metal queda molido dentro de la masa en forma de pequeños fragmentos metálicos dispersos. Luego se estira la mezcla para formar una película sobre la superficie de madera encima de la cual se aplican los diseños de acuerdo con la composición deseada. Es así como el fondo adquiere un particular acabado brillante (Figuras 11, 12 y 13) cuya apariencia es diferente a la que exhibe la hoja de plata cuando se utiliza como lámina intercalada entre dos membranas de mopa-mopa.

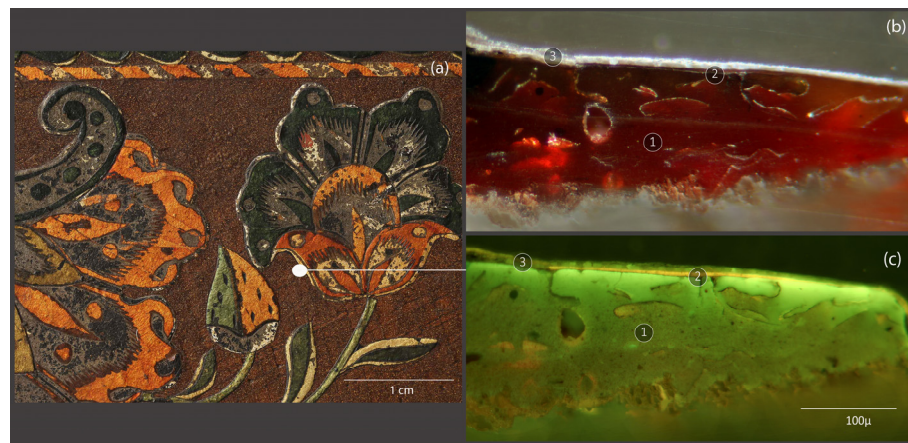

**Figura 11.** (a) Se observa el brillo chispeante del fondo marrón rojizo logrado por la "venturina" (1), sobre la cual se aplicaron los diseños. El punto blanco en la imagen corresponde al lugar de la toma de muestra. (Fotografía: Álvarez-White, M.C). En el corte estratigráfico (b) se muestra el fondo inferior de resina, de color rojo, con partículas irregulares de plata molida), sobre la que se aplicaron otras capas (2 y 3). El estrato 3 corresponde a una hoja de plata coloreada, como membrana compuesta (Fig. 5). La imagen (c) es la misma muestra observada bajo la lámpara de fluorescencia UV (análisis y fotografía: Fernández M.O.). Detalle. Colección privada.

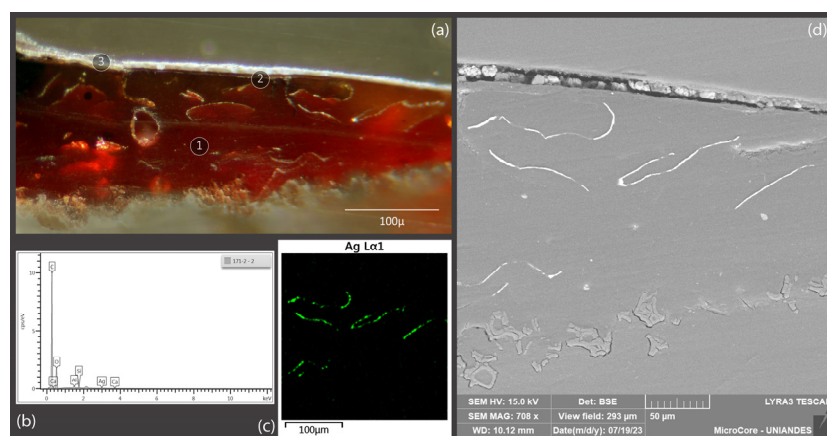

**Figura 12.** La sección transversal (a) muestra la capa general de base elaborada con "venturina" (1). En la imagen MEB (d) se observan los fragmentos irregulares de plata dentro de la resina, producto del proceso de amasado. La capa (2) es la resina tinturada de naranja, mientras que la 3 corresponde a una membrana compuesta con hojilla de plata. El espectro EDS (b) y el mapa EDS (c) corroboran la presencia de plata pura (Ag) (análisis y fotografía: Fernández M.O.). Detalle. Colección privada.

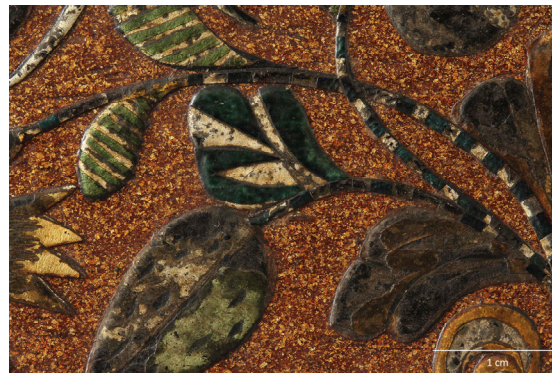

**Figura 13.** El efecto creado por la 'venturina' utilizada como fondo de la composición genera un acabado brillante que contrasta con los detalles decorativos aplicados encima. Estos últimos están elaborados con hoja de plata intercalada entre dos membranas de resina que, dependiendo del tinte que se le da a la superior, adquiere una tonalidad específica. La hoja de metal así utilizada adquiere un efecto óptico ligeramente diferente al del fondo. (Fotografía: Álvarez-White, M.C). Detalle. Colección privada.

### 3.5. La aparición de otros metales

Algunas piezas del período republicano [ca.1819–1886] han sido datadas observando la presencia de elementos iconográficos tales como los diferentes escudos que se utilizaron hasta lo que hoy es la República de Colombia. Un cambio significativo durante este período fue la introducción del latón, que se utilizó junto con el pan de plata.

El latón consiste en una aleación de cobre y zinc que se emplea a partir de finas láminas metálicas recubiertas con capas traslúcidas de resina (Figura 11). Se aplican mediante un procedimiento similar al descrito para las membranas compuestas con la hojilla de plata. Su acabado provee un matiz metálico tornasolado diferente con lo cual se amplía la gama cromática.

En las piezas de esta época abundan fondos de acabado mate por la utilización de albayalde. Sobre estos se aplican decoraciones iridiscentes en varias tonalidades con las que se consiguen, entre otros, los efectos cromáticos cobrizos propios del latón y del áureo que se obtiene con la membrana tinturada de amarillo para cubrir la plata.

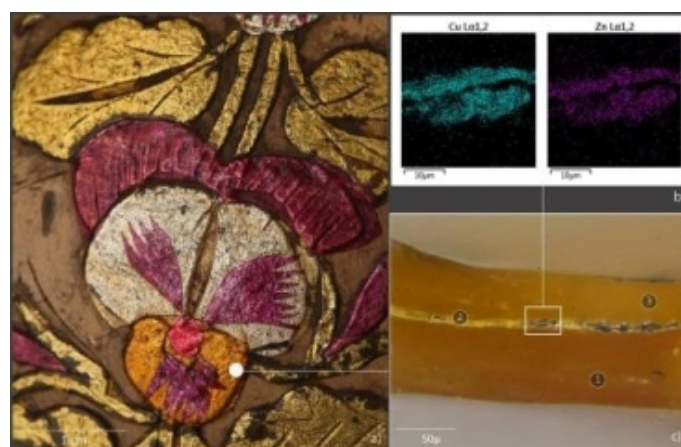

**Figura 14.** El pétalo inferior, con acabado cobrizo, se logró con hoja de latón (a), mientras que los blancos iridiscentes y los reflejos dorados de las hojas se realizaron, en el segundo caso, con hojilla de plata tinturada de amarillo para obtener el efecto áureo. El punto blanco en la imagen (a) corresponde al lugar de la toma de muestra. (Fotografía: Álvarez-White, M.C.). Como se puede observar en el mapeo elemental (c) de una sección estratigráfica (b) a 400x, la capa metálica (2) es una aleación de cobre y zinc (Cu-Zn). Las capas 1 y 3 corresponden a la resina tinturada (c). (Análisis y fotografía: Fernández, M.O).



#### 4. Conclusiones

Las dificultades para datar las piezas decoradas con barniz de Pasto crean obstáculos para establecer una cronología precisa. Se ha perdido el rastro de gran parte de las obras, muchas están dispersas en colecciones privadas e incluso las pocas piezas que se encuentran en los museos carecen de información sobre su procedencia.

A la llegada de los españoles las poblaciones indígenas ya conocían la resina y la manejaban con destreza. El interés que despertó en ellos el uso de la mopa-mopa generó la necesidad de una producción que respondiera a esa demanda. Los objetos se realizaron por encargo con destino a una élite política y religiosa que en oportunidades los enviaba al extranjero.

El carbonato de calcio utilizado en las cuentas en la época prehispánica fue sustituido por blanco de plomo, un material importado de España que los barnizadores adaptaron para su uso en la técnica mezclándolo, en forma de polvo, con la resina. Este pigmento blanco es común en las piezas tempranas elaboradas posiblemente en los inicios del siglo XVII cuando ya existía un asentamiento poblacional que se podía dedicar a estas labores.

La continuidad del uso del blanco de plomo se aprecia en los objetos desde la llegada de los españoles hasta la época republicana.

Se podría pensar que la hojilla de plata se introdujo hacia mediados o finales del siglo XVII y constituyó un aspecto importante en la evolución de la técnica al ser apropiada con características únicas. La fina hojilla metálica se utilizó en forma de membranas compuestas. Con ayuda de calor y presión manual se aplicó directamente sobre las superficies de los nuevos objetos sin que mediara base de preparación alguna. En esta etapa también se incrementó la gama cromática al utilizar colorantes cuya transparencia, una vez mezclados con la resina, permitían obtener destellos metálicos en diferentes tonalidades además del color blanco iridiscente propio de la hojilla.

El calomel utilizado en el barniz de Pasto confiere a la decoración un acabado diferente al tono opaco que aporta el blanco de plomo. Curiosamente, este material se ha encontrado en Europa, también de forma excepcional, en manuscritos y miniaturas de los siglos XV and XVI según Crippa et al. [30] (pág. 15).

Tanto las descripciones de los cronistas como las investigaciones realizadas hasta el momento identifican el brillo como un elemento característico y recurrente en el siglo XVIII, cuando la técnica alcanzó su mayor esplendor. Durante este período, el uso de hojilla de plata molida conocida como 'venturina' introdujo un efecto novedoso en el barniz de Pasto para crear un particular acabado centelleante. Este método constituye una forma innovadora de utilizar la hojilla de plata que, hasta el momento, sólo se ha encontrado en piezas decoradas con esta técnica.

En la época republicana, que apenas comienza a ser estudiada sistemáticamente, se ha documentado la presencia de hojilla de latón. Se aplica de manera similar a las membranas compuestas con la hojilla de plata, pero confiere un tono diferente de acabado cobrizo como se aprecia en la imagen (a) de la Figura 14. En estas piezas también se emplea el albayalde mezclado con la resina como fondo de las composiciones.

Existen muchos aspectos de la técnica del barniz de Pasto que aún están por investigar, entre los cuales se destacan: el inicio de la utilización de la hojilla de plata y del calomel, así como la interrupción de su uso. Así mismo se requiere la identificación en laboratorio, de la mayor parte de los colorantes, las influencias foráneas en la decoración y los impactos en la salud de los artesanos por la ingestión directa de plomo y mercurio al masticarlos para amalgamarlos con la resina.

**Contribuciones de los autores:** Conceptualización: M.C.Á.-W. Redacción, elaboración del borrador y diseño gráfico de las figuras: D.C. Análisis: M.O.F. Redacción, revisión y edición: M.C.Á.-W. Todos los autores han leído y están de acuerdo con el manuscrito publicado.

**Financiamiento:** Este estudio no ha recibido financiación externa complementaria.

**Declaración de disponibilidad de datos:** No aplicable.

**Agradecimientos:** Agradecemos amablemente a la Universidad de los Andes y al Fondo de Apoyo para Profesores Asistentes por la provisión de financiamiento interno para los análisis de imágenes multiespectrales y MEB-EDS. Los autores también agradecen a Chiara Perera Jayasekarage e Izzy Seah del University College London (UCL) por la traducción al inglés de la versión original en español de este artículo.

**Conflictos de intereses:** Los autores declaran que no existen conflictos de intereses.

## Referencias

1. Newman, R.; Kaplan, E.; Álvarez-White, M.C. "The History of Elaeagia Resin (Mopa-Mopa), So Far". In: *Heritage* **2023**, 6(5), 4320–4344
2. Melchar, D.; Burgio, L.; Fernández, V.; Keneghan, B.; Newman, R. "A collaborative, multidisciplinary and multi-analytical approach to the characterisation of barniz de Pasto objects from the V&A collections". In: Bridgland J. (Ed.) *Transcending Boundaries: Integrated ICOM-CC 19th Triennial Conference Preprints* (Beijing, 17–21 May 2021). Paris: International Council of Museums, 1–8.
3. Pozzi, F.; Basso, E.; Katz, M. "In search of Humboldt's colors: materials and techniques of a 17th -century lacquered gourd from Colombia," *Heritage Science*, **2020**, 8, (101), 2–16, doi: 10.1186/s40494-020-00449-1
4. Sánchez L., A. "Análisis de los materiales de una arqueta decorada con barniz de Pasto, perteneciente a la colección del Museo de América de Madrid". *Anales del Museo de América*, **2020**, (28), 170–179.
5. Burgio, L.; Melchar, D.; Strekopytov, S.; Pegg, D.; Melchiorre, M.; Keneghan, B.; Najorka, J.; Goral, T.; Garbout, A.; Clark, B. "Identification, characterisation and mapping of calomel as 'mercury white', a previously undocumented pigment from South America, and its use on a barniz de Pasto cabinet at the Victoria and Albert Museum". *Microchemical Journal*, **2018**, 143: 220–27, doi:10.1016/j.microc.2018.08.010.
6. Álvarez-White, M.C. *El barniz de Pasto. Secretos y revelaciones*. Ediciones Universidad de los Andes: Bogotá, 2023 p.190, ISBN 978-958-798-318-0.
7. Simón, P. fray. *Noticias historiales de las conquistas de tierra firme en las Indias Occidentales*. Biblioteca del Banco de la República. Imprenta Medardo Rivas: Bogotá, 1891.
8. Fernández de Piedrahita, L. *Historia general de las conquistas del Nuevo Reyno de Granada* (vols. 1–2). Imprenta Medardo Rivas: Bogotá, 1881.
9. Juan, J. y de Ulloa, A. *Relacion Historica del Viage a la America Meridional Hecho de Orden de S. Mag. Para Medir algunos Grados de Meridiano Terrestre, y venir por ellos en conocimiento de la verdadera Figura y Magnitud de la Tierra, con otras Observaciones Astronómicas y Phisicas*. Antonio Marin: Madrid, 1748.
10. Robinson, D. *Diario de don Miguel de Santisteban. Mil leguas por América: de Lima a Caracas, 1740–1741*. Banco de la República: Bogotá, 1992, ISBN 978-958-902-880-3.
11. Magnin, J., *Descripción de la provincia y misiones de Mainas en el Reino de Quito*. [1740–1745]. Biblioteca ecuatoriana Aurelio Espinosa Pólit: Quito, 1998, ISBN 997-840-500-3.
12. De Santa Gertrudis, J. *Maravillas de la naturaleza* (vols. 1–4). Linkgua ediciones: Madrid, 2010, ISBN 978-849-816-561-6.
13. De Velasco, J. *Historia del reino de Quito. La historia natural* (vol. 1), [1727–1792] Empresa Editora El Comercio: Quito, 1946.
14. Humboldt, A. *Alexander von Humboldt en Colombia: extractos de sus diarios*. Academia Colombiana de Ciencias Exactas, Físicas y Naturales: Bogotá, p. 127, 1982.
15. Mutis, J. C. *Diario de observaciones de José Celestino Mutis 1760– 1790*. Transcripción, prólogo y notas de Guillermo Hernández de Alba. Editorial Minerva: Bogotá, 1958.
16. Hamilton, J. P. *Viajes por el interior de las provincias de Colombia (1824)*. Publicaciones del Banco de la República: Bogotá, 1955.
17. Boussingault, J. B. *Memorias* (vol. 5). Banco de la República. Departamento Editorial: Bogotá, 1985.
18. André, É. F. "América equinoccial (Colombia-Ecuador)." En Wiener, C., Hildibrand, H., Kohl, A., Barbant, C., Vignal, P. and, Riou, E. (Eds.). *América pintoresca: descripción de viajes al Nuevo Continente por los más modernos exploradores 1884* (vol. 3, pp. 755–767). Edición facsimilar de Carvajal S.A., Bogotá, p.755, **1981**.
19. Holton, I. F. *La Nueva Granada: Veinte meses en los Andes*. Ediciones Banco de la República: Bogotá, 1981.
20. Duque G., L. y Cubillos, J. C. *Arqueología de San Agustín: Alto de Lavapatas*. Fundación de Investigaciones Arqueológicas Nacionales. Banco de la República: Bogotá, 1988.
21. Uribe, M. V. (1986). "Pastos y protopastos: la red regional de intercambio de productos y materias primas de los siglos x a xvi d. C." *Maguaré*, **1986**, 3(3), 33–46.

22. Humphrey, N.; Burgio, L.; Melchar, D. "One small corner of the Viceroyalty in South Kesington: barniz de Pasto at the Victoria and Albert Museum, London." *Anales del Museo de América*, **2020**, (28), p.150.
23. Sánchez J. M. y Quiñones M.D. "Materiales pictóricos enviados a América en el siglo XVI". *Anales del Instituto de Investigaciones Estéticas*, **2009**, 31(95), 45-67, doi: 10.22201/iee.18703062e.2009.95.2293.
24. Newman, R. y Derrick, M. "Painted Qero Cups from the Incas and Colonial Periods in Peru: An Analytical Study of Pigments and Media," in Vandiver, P., Goodway, M., Druzik, J.R., and, Mass, J.L (eds.), *Materials Issues in Art and Archaeology VI*, 2001, Boston Massachusetts, USA) (Warrendale, PA: Materials Research Society, 2202), pp. 291–302.
25. Newman, R. y Derrick, M. *Analytical Report Lab*. Project 2016-58 No. BP-15 [unpublished] Scientific Research Lab, Museum of Fine Artes, Boston, 2016.
26. Álvarez-White, M.C. "El barniz de Pasto: reflejo de la naturaleza". In: *Barroco. Naturaleza y paisaje. IX Encuentro internacional sobre barroco*. Fundación Visión Cultural. La Paz, Bolivia. 2019, p. 339–346
27. Kawamura, Y. "Laca japonesa urushi de estilo namban en España. Vías de su llegada y sus destinos. *Lacas namban: Huellas de Japón en España. IV Centenario de la embajada de Keicho*. Kawamura, Y. (ed.). Fundación Japón y Ministerio de Educación, Cultura y Deporte: Madrid, 2013, 249–296.
28. Romero R.; Adelina I.; Bondía, C. "Consideraciones preliminares sobre la técnica y restauración de objetos de barniz de Pasto o mopa-mopa". *Anales del Museo de América*, **2020**, (28), 157–169.
29. Barba, A. (2022). *Arte De Los Metales: En Que Se Enseña El Verdadero Beneficio De Los De Oro Y Plata Por Azogue: El Modo De Fundirlos Todos, Y Como Se Han De Refinar Y Apartar Unos De Otros. Nuevamente Ahora Añadido Con El Tratado De Las Antiguas Minas De España*, (1817) LEGARE STREET Press, 2022, ISBN 9781019231777.
30. Crippa, M.; Legnaioli, S.; Kimbriel, C.; Ricciardi, P. "New evidence for the intentional use of calomel as a white Pigment". *Journal of Raman Spectroscopy*, **2021**, 52, p. 15, doi: 10.1002/jrs.5876.
31. Cicala, M. S.J. (1994). *Descripción histórico-topográfica de la Provincia de Quito de la Compañía de Jesús, parte primera Viterbo, 1771*. (tomo 2). Biblioteca Ecuatoriana Aurelio Espinosa Pólit e Instituto Geográfico Militar: Quito, **1994**, ISBN 978971106.
32. Friedemann, N. de "El barniz de Pasto. Arte y rito milenario" *Revista lámpara* **1985**, 23 (96), p. 15–24.
33. Bruquetas, R. G. *Técnicas y materiales de la pintura española en los siglos de oro*. Fundación Telefónica de Madrid: España, 1992; p. 560. ISBN 9788493003036.
34. Santisteban, M. *Mil leguas por América, de Lima a Caracas, 1740–1741. Diario de don Miguel de Santisteban*. David J. Robinson (ed.) Banco de la República: Bogotá, 1992.
